# Supplementary material for: The role of semen and seminal plasma in inducing large-scale genomic changes in the female porcine peri-ovulatory tract
Source: PubMed Central journal article supplement (PMC7081221; doi:10.1038/s41598-020-60810-z), 2020-03-19

# Supplementary Figure 1-14.

**Differential expression (up- and down-regulation) of annotated genes** in the mucosa of the internal genital tract of sows after Mating or artificial deposition of the sperm-peak portion P1 (P1-AI); sperm-free seminal plasma of the whole ejaculate (SP-Ejac) or of pooled P1 (SP-P1), **classified in molecular function (Fig 1 to 7) and biological function (Fig 8 to 14)**. All treatments were compared to Control (AI with 50 mL of BTS). The numbers represent the number of differentially expressed genes (p-value < 0.05). Endocervix (EndoCvx), endometrium (distal: DistEndom or proximal: ProxEndom) and endosalpinx from 4 different segments; the utero-tubal junction (UTJ), isthmus (Isth), ampulla (Amp) and infundibulum (Inf).

# Supplementary Figure 1. Molecular function in EndoCvx

■ Mating UP   ■ Mating DOWN   ■ P1-AI UP   ■ P1-AI DOWN   ■ SP-P1 UP   ■ SP-P1 DOWN   ■ SP-Ejac UP   ■ SP-Ejac DOWN

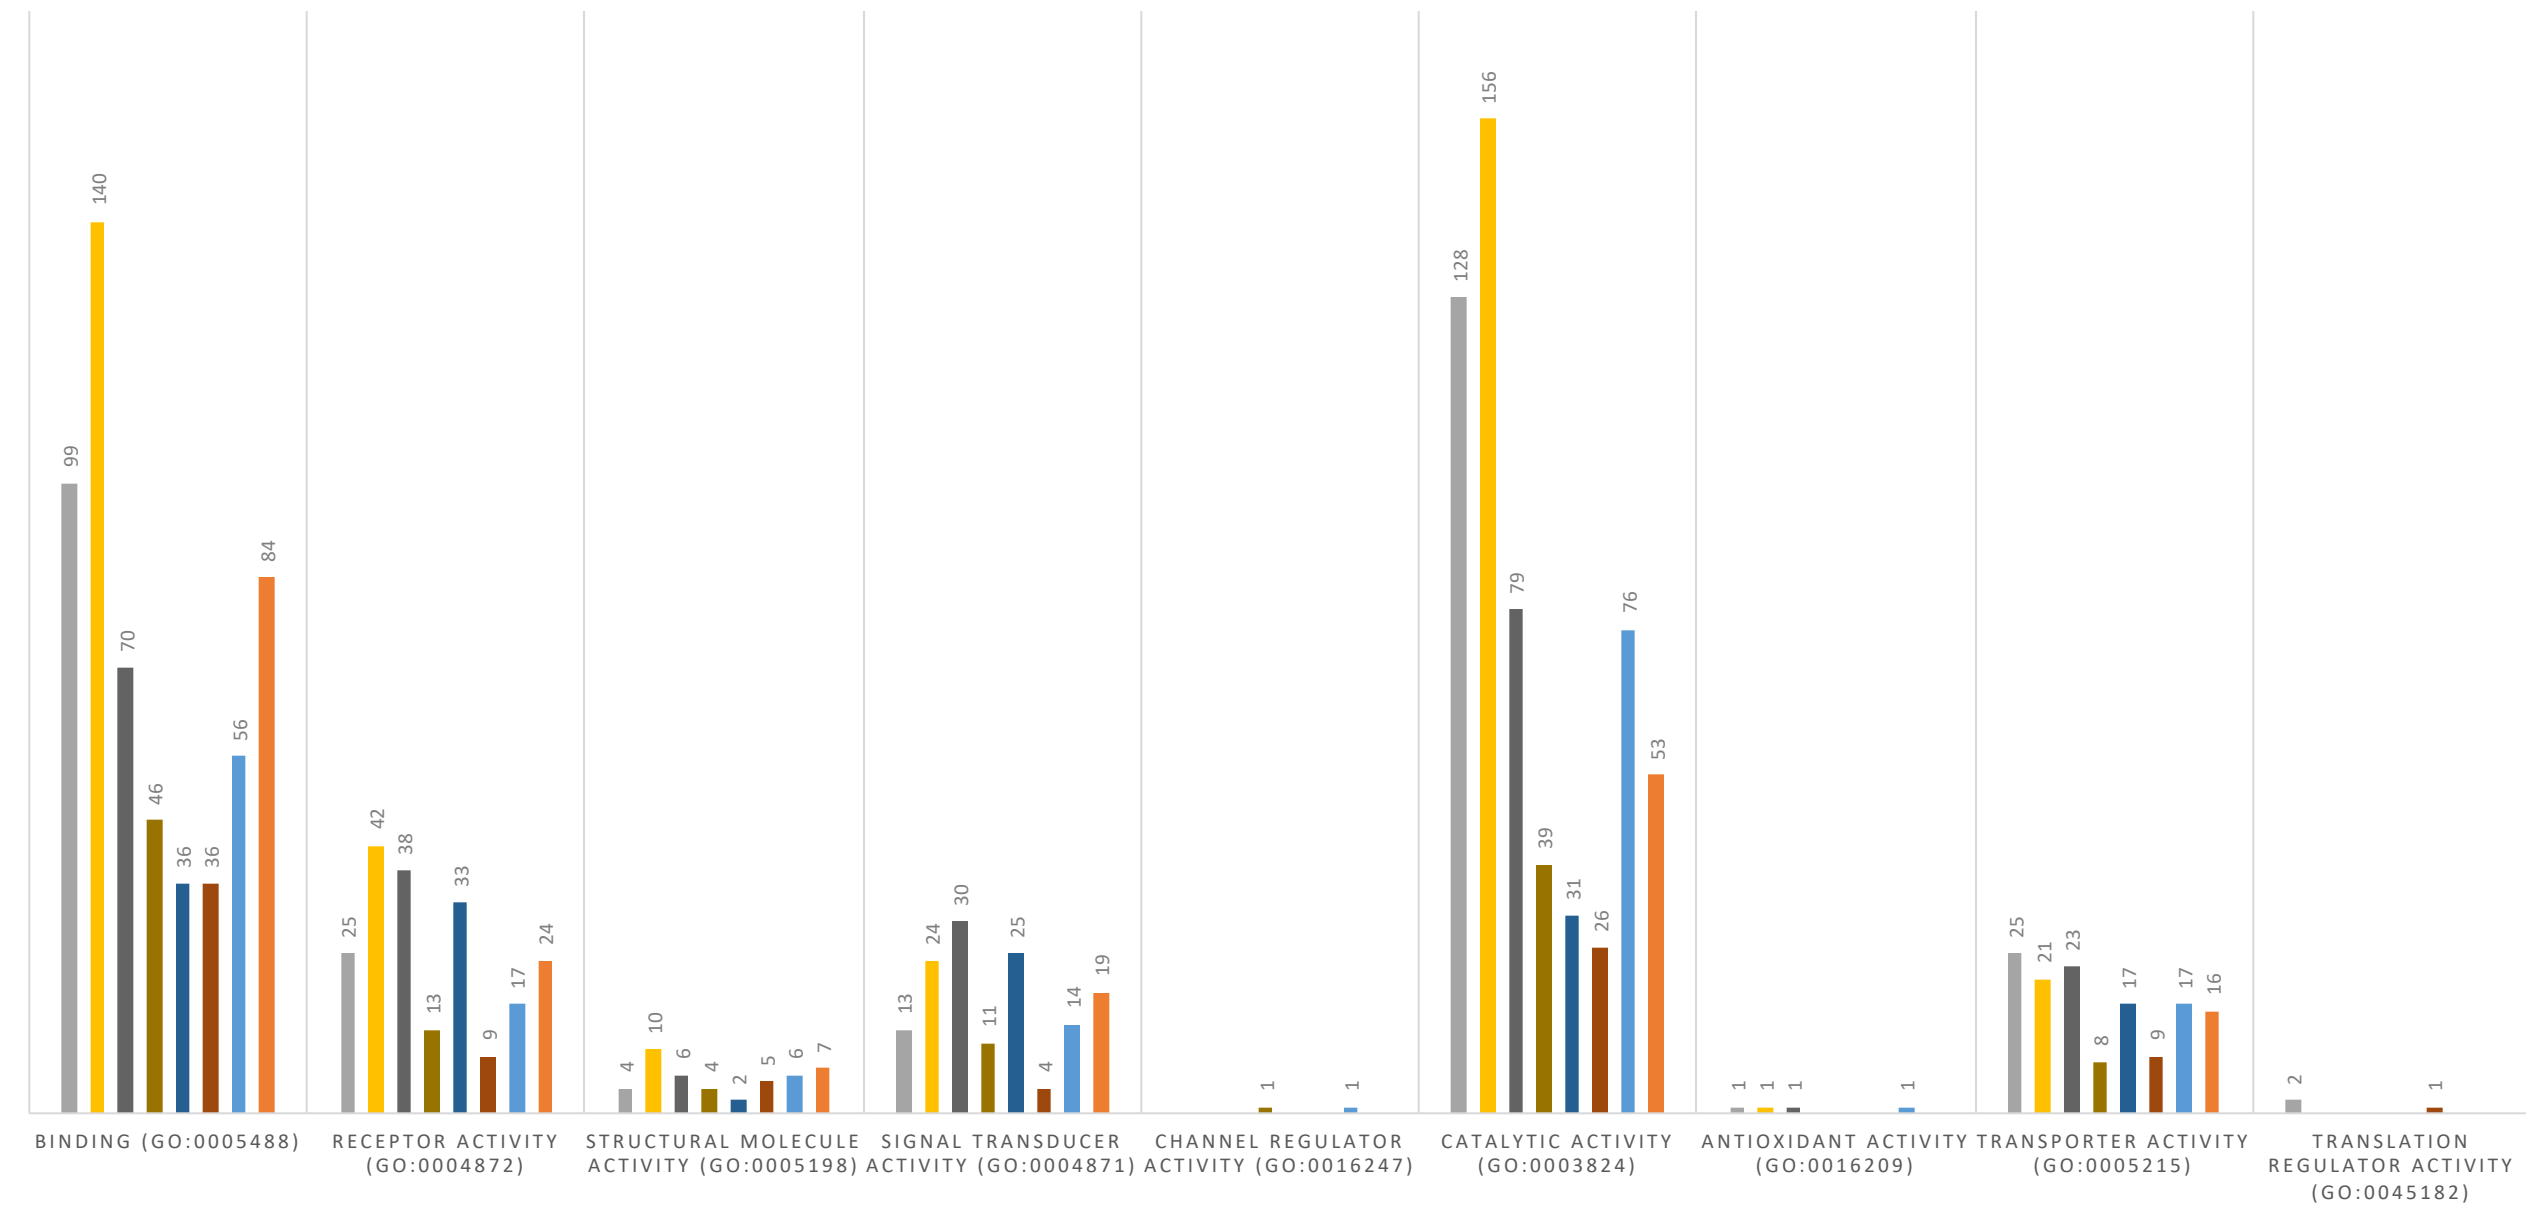

# Supplementary Figure 2. Molecular function in DistEndom

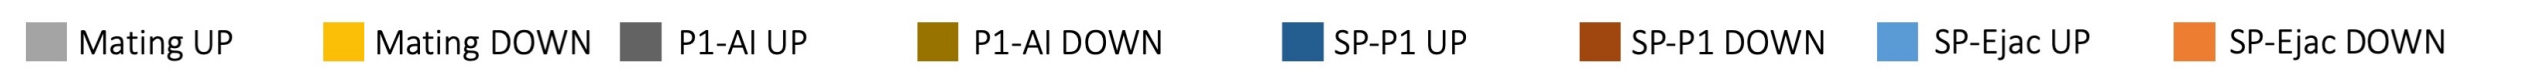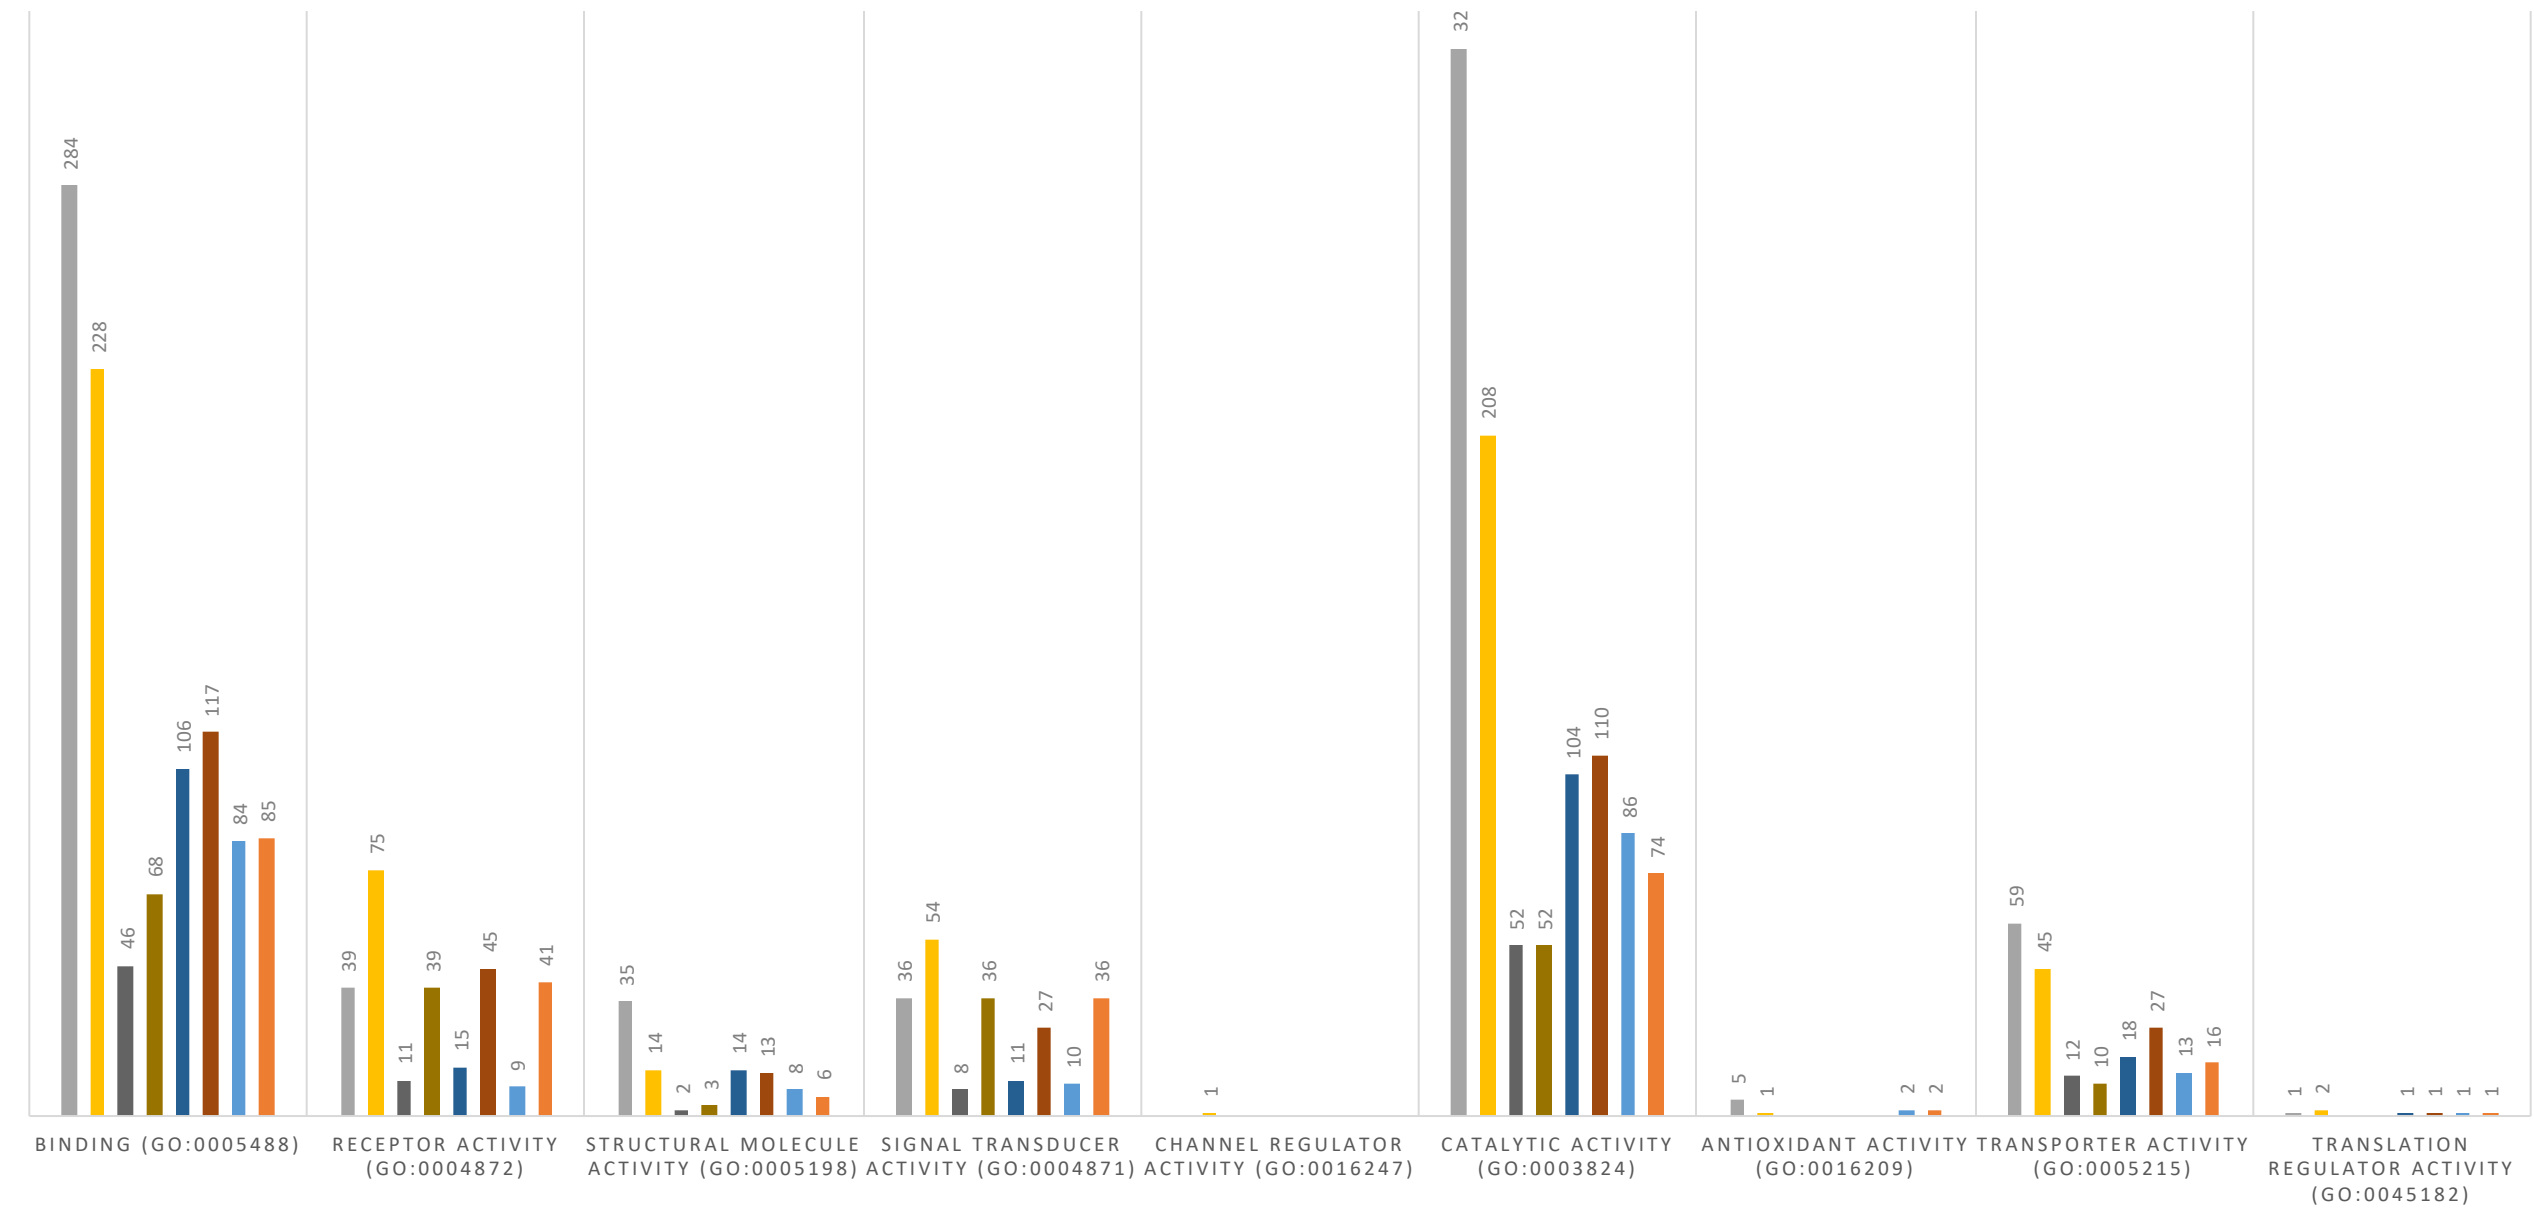

# Supplementary Figure 3. Molecular function in ProxEndom

Mating UP    
  Mating DOWN    
  P1-AI UP    
  P1-AI DOWN    
  SP-P1 UP    
  SP-P1 DOWN    
  SP-Ejac UP    
  SP-Ejac DOWN

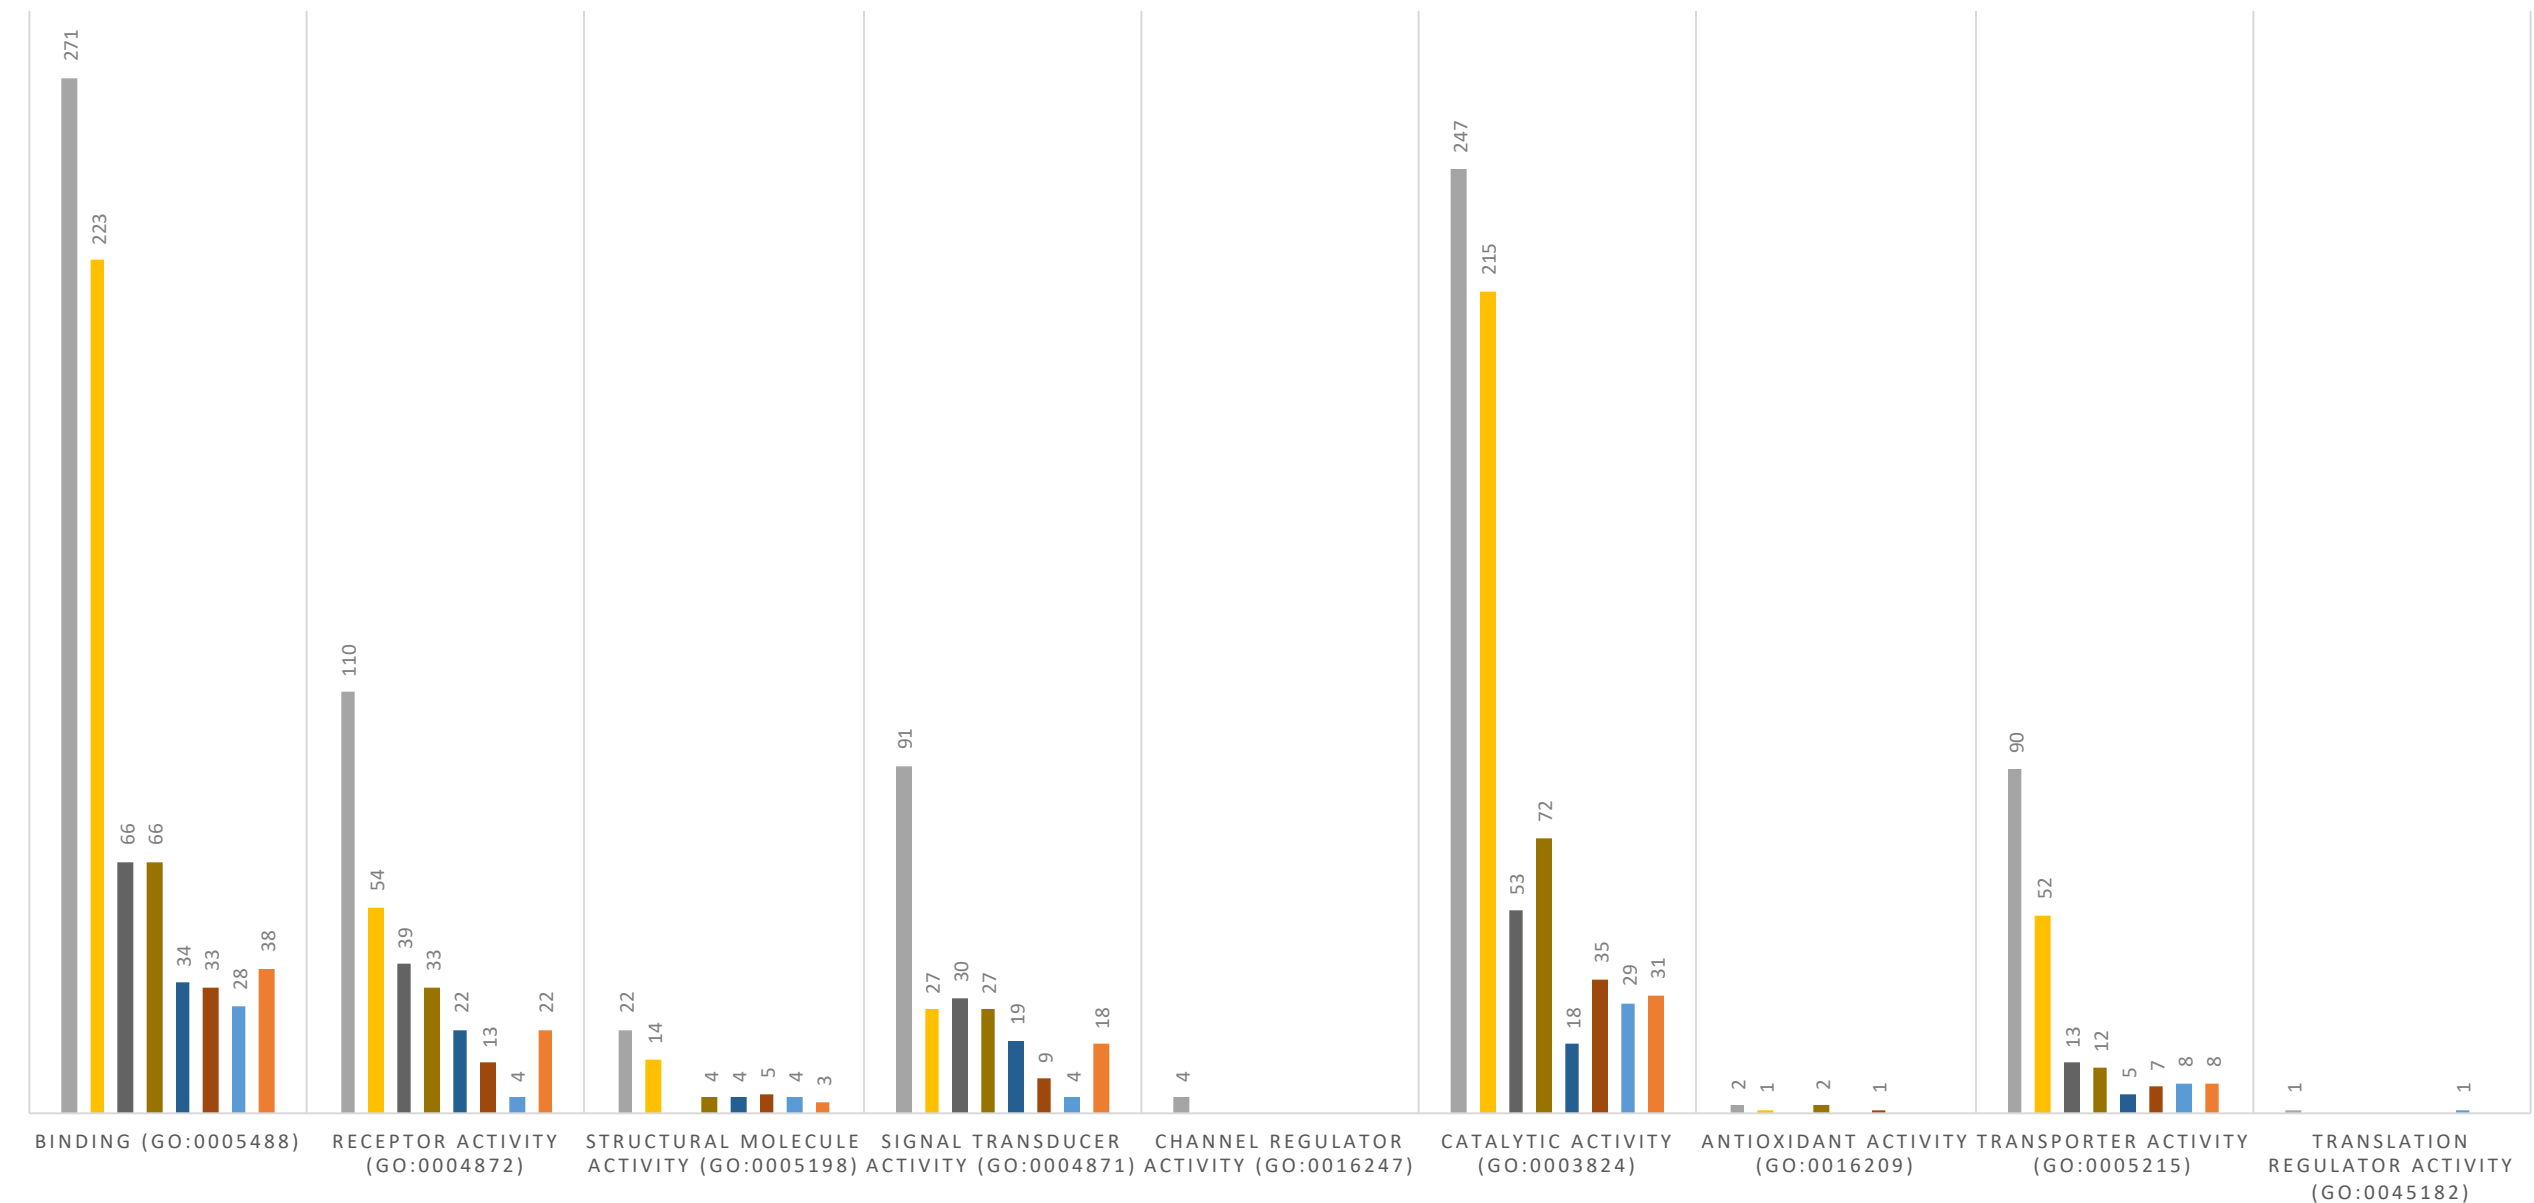

# Supplementary Figure 4. Molecular function in UTJ

Mating UP    
  Mating DOWN    
  P1-AI UP    
  P1-AI DOWN    
  SP-P1 UP    
  SP-P1 DOWN    
  SP-Ejac UP    
  SP-Ejac DOWN

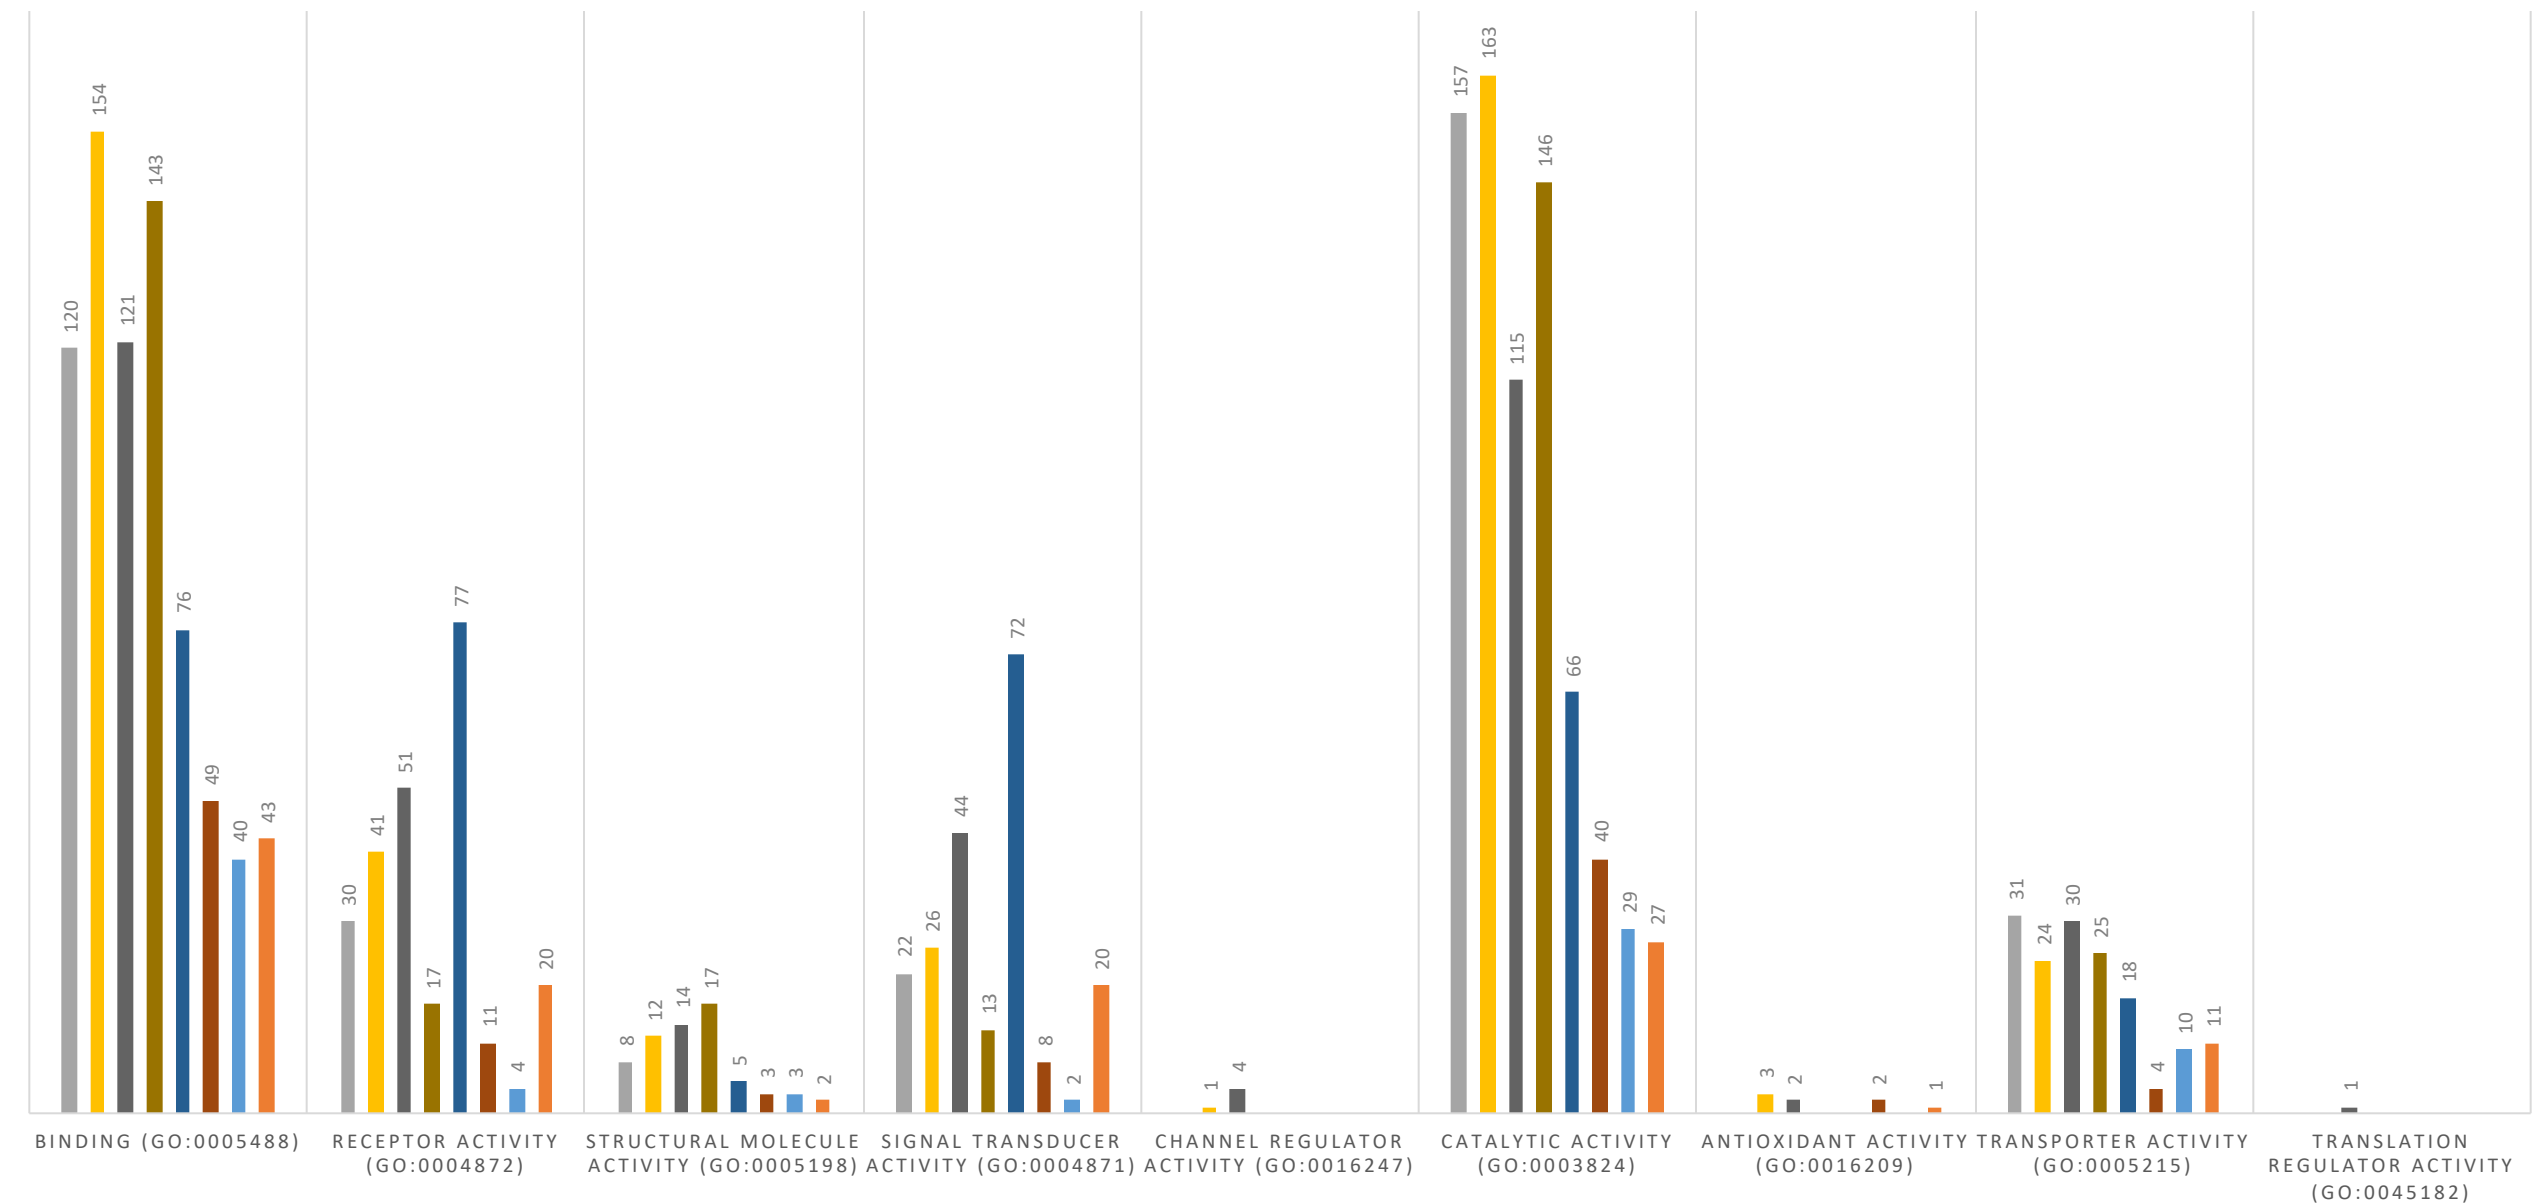





# Supplementary Figure 7. Molecular function in Inf

Mating UP
  Mating DOWN
  P1-AI UP
  P1-AI DOWN
  SP-P1 UP
  SP-P1 DOWN
  SP-Ejac UP
  SP-Ejac DOWN

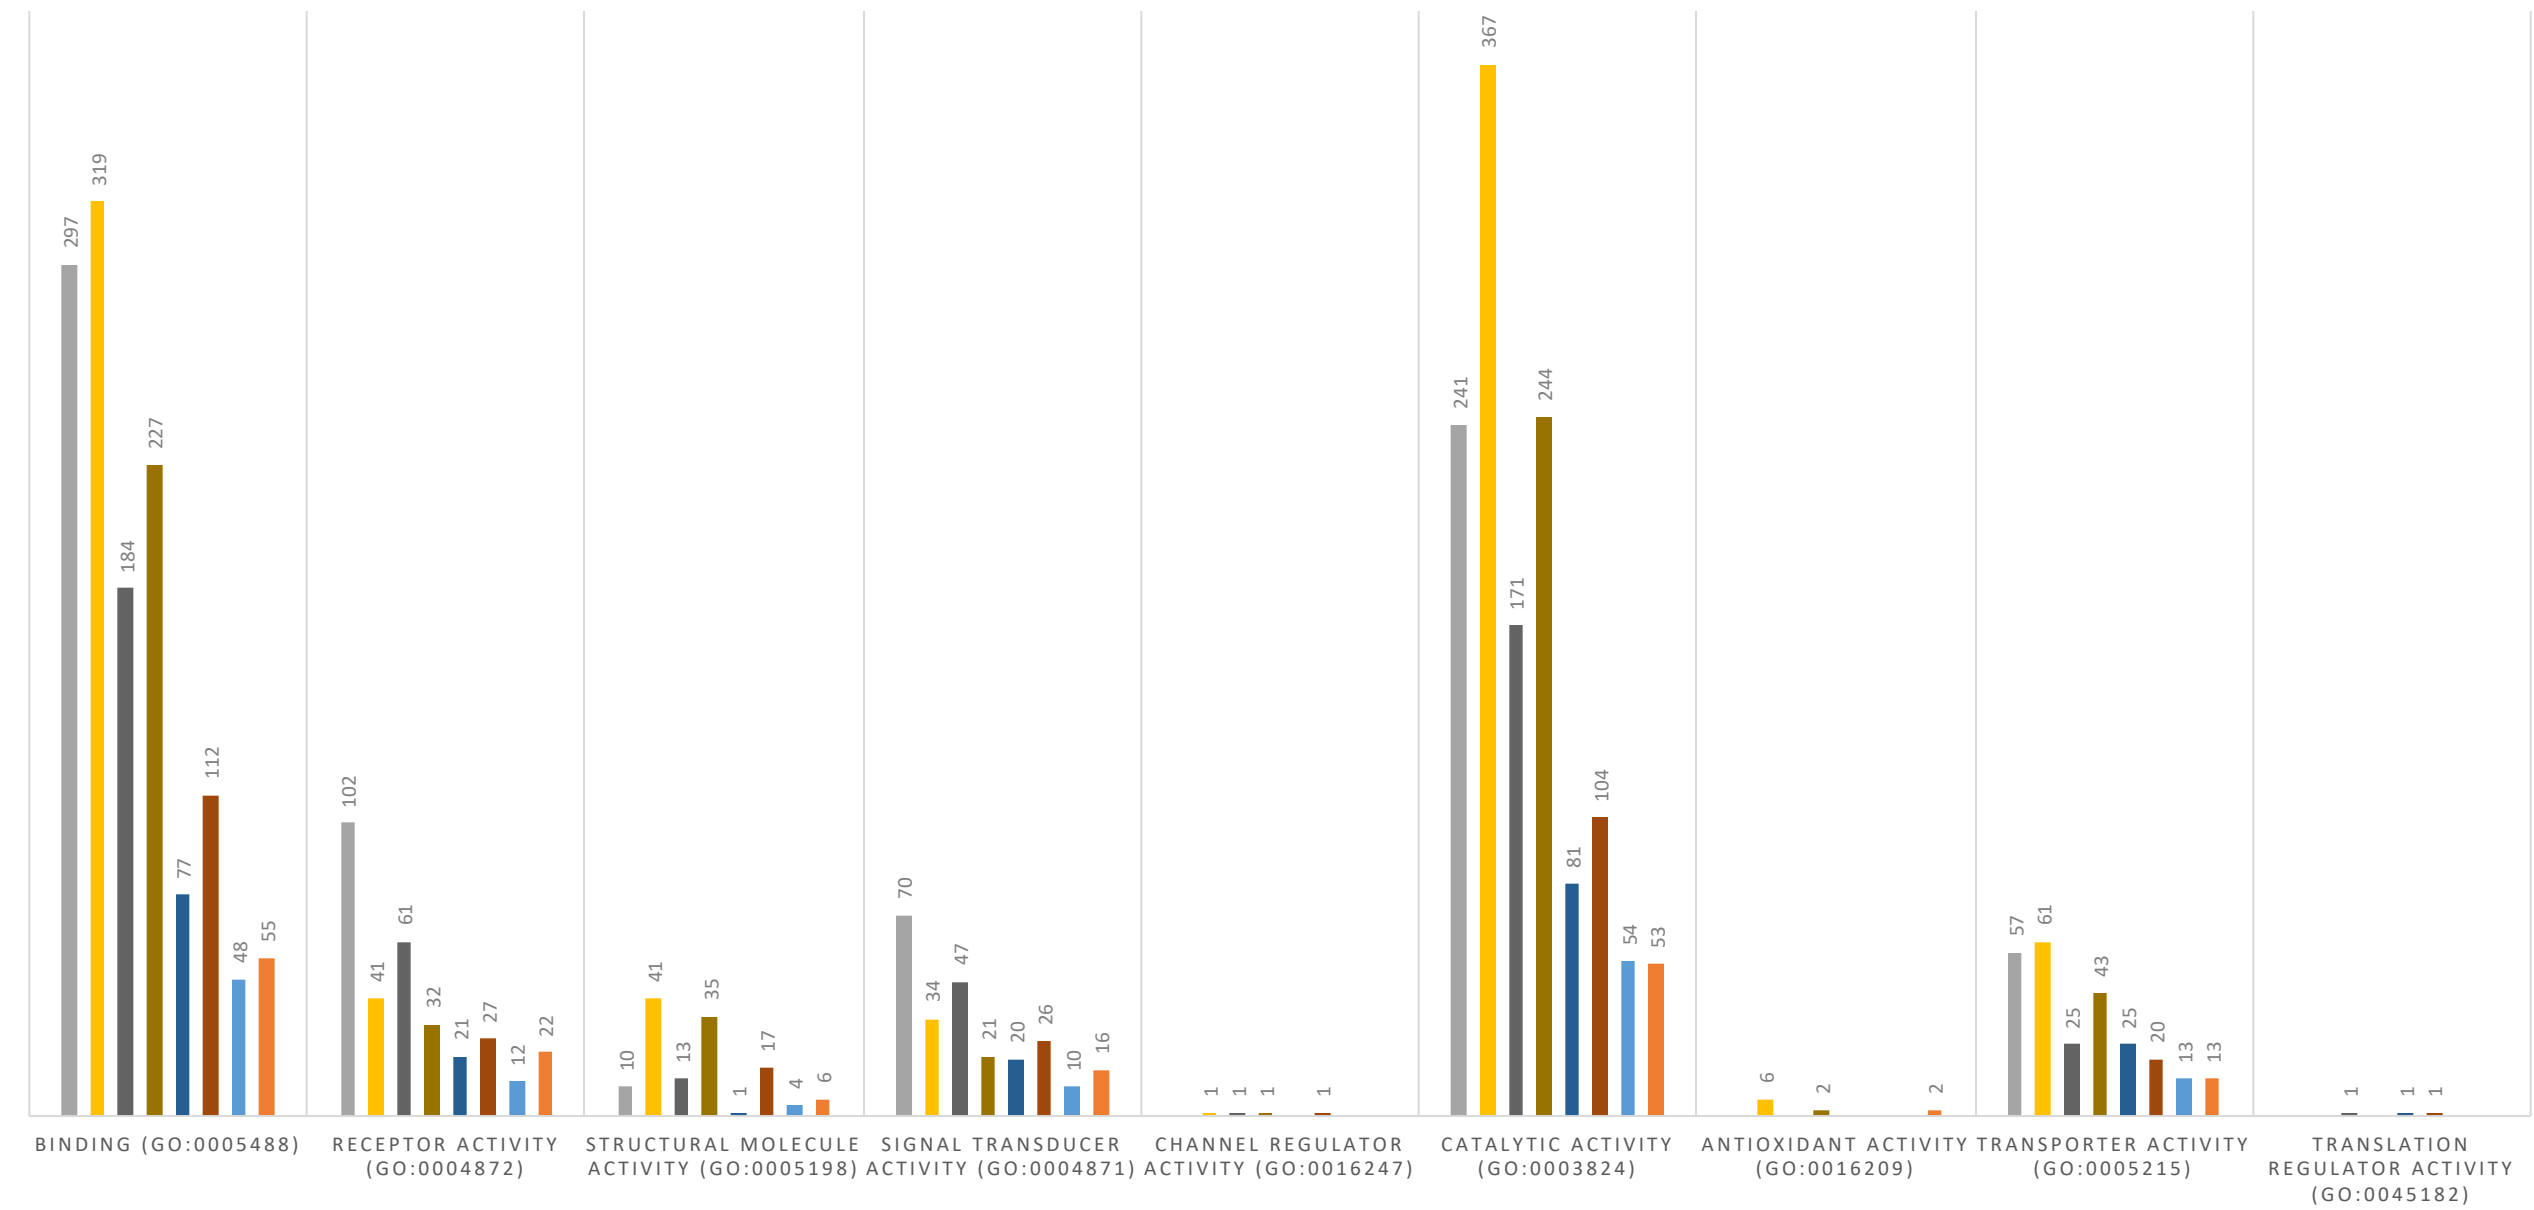















# Supplementary Figure 14. Biological process in Inf

Mating UP    
  Mating DOWN    
  P1-AI UP    
  P1-AI DOWN    
  SP-P1 UP    
  SP-P1 DOWN    
  SP-Ejac UP    
  SP-Ejac DOWN

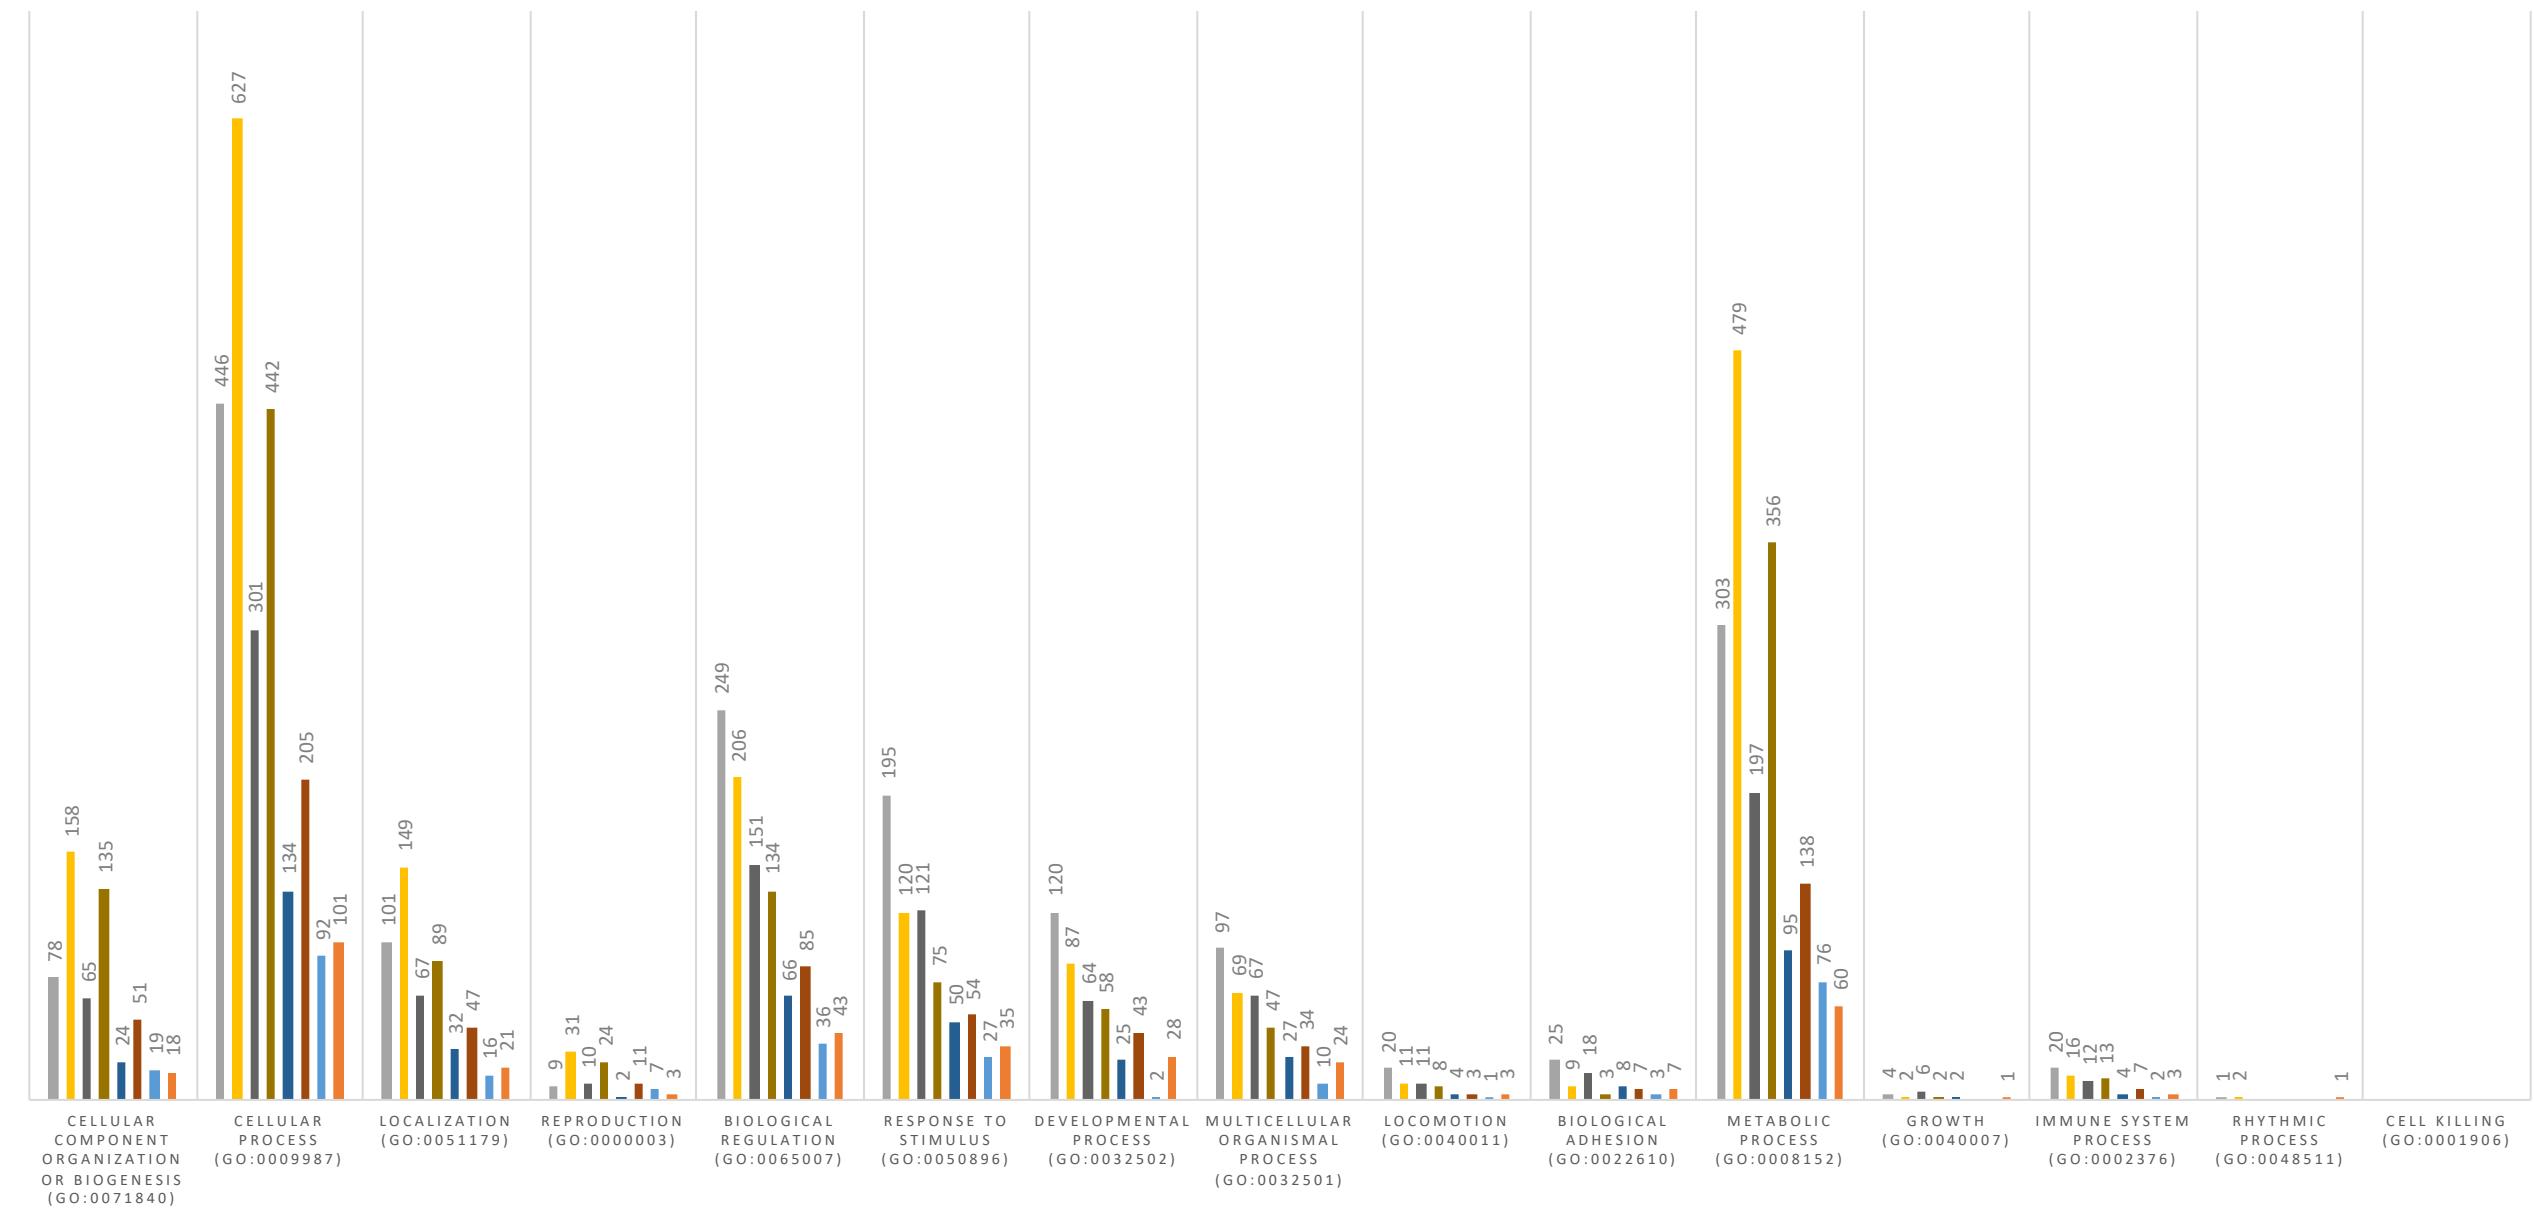

Supplement: 41598_2020_60810_MOESM1_ESM.pdf [file 41598_2020_60810_MOESM1_ESM.pdf]
